# Supplementary material for: Transcriptome data from three endemic Myrtaceae species from New Caledonia displaying contrasting responses to myrtle rust (Austropuccinia psidii)
Source: PubMed Central journal article supplement (PMC6362868; doi:10.1016/j.dib.2018.12.080), 2019-01-03
Supplement: mmc2.pdf [file mmc2.pdf]

Supplementary figure 1: EdgeR's plotSmear function plots the log-fold change (i.e., the log ratio of normalized expression levels between non-infected and infected) against the log counts per million (CPM).

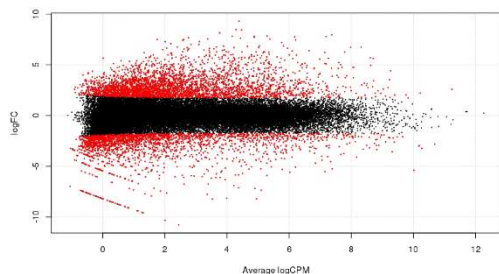

A. PlotSmear from *A. gummiferum* using the de novo transcriptome assembly as reference for alignment.

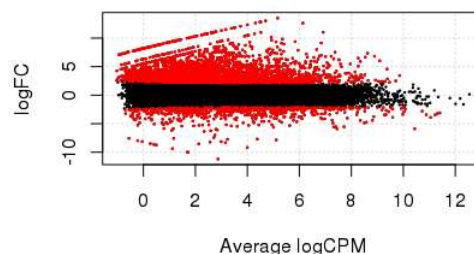

B. PlotSmear from *A. gummiferum* using the *E. grandis* genome as reference for alignment.

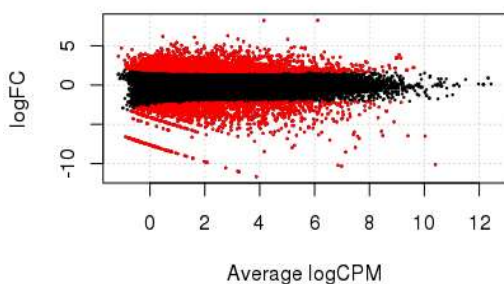

C. PlotSmear from *S. longifolium* using the de novo transcriptome assembly for alignment.

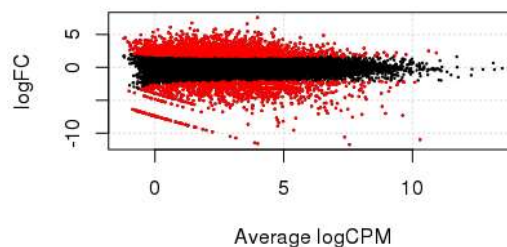

D. PlotSmear from *S. longifolium* using the *E. grandis* genome as reference for alignment.

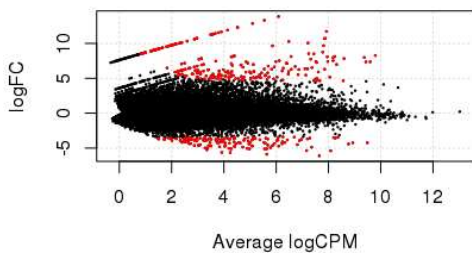

E. PlotSmear from *T. glauca*-FAR using the de novo transcriptome assembly for alignment.

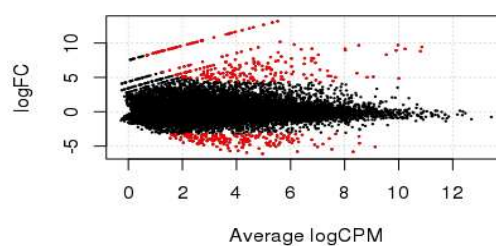

F. PlotSmear from *T. glauca*-FAR using the *E. grandis* genome as reference for alignment.

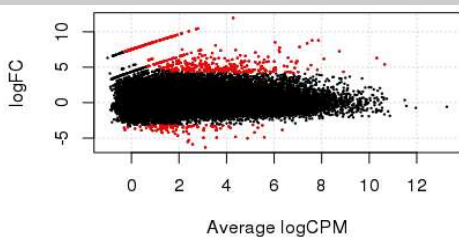

G. PlotSmear from *T. glauca*-BDS using the de novo transcriptome assembly for alignment.

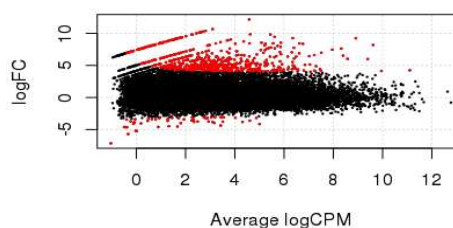

H. PlotSmear from *T. glauca*-BDS using the *E. grandis* genome as reference for alignment.
